# Supplementary material
Source: MDPI journal article supplement (https://www.mdpi.com/2673-7272/4/1/13)
Supplement: s1 [file s1]

## Supplementary Materials

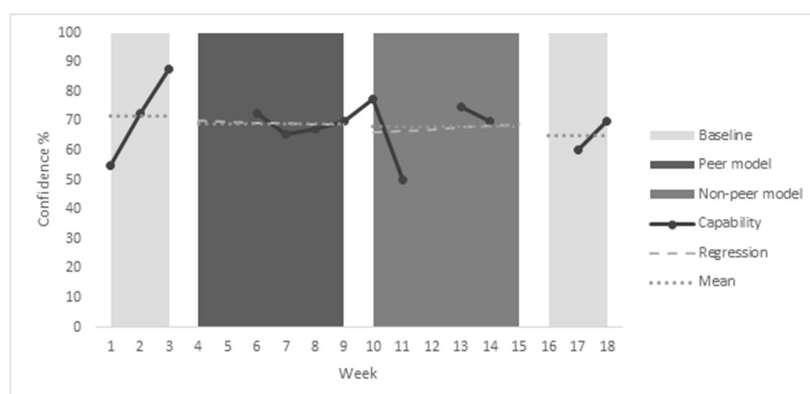

**Figure S1.** *Self-efficacy-as-capability for participant 1*

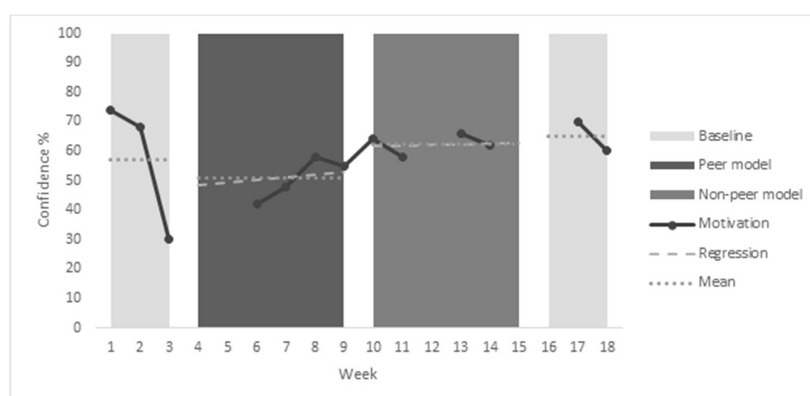

**Figure S2.** *Self-efficacy-as-motivation for participant 1*

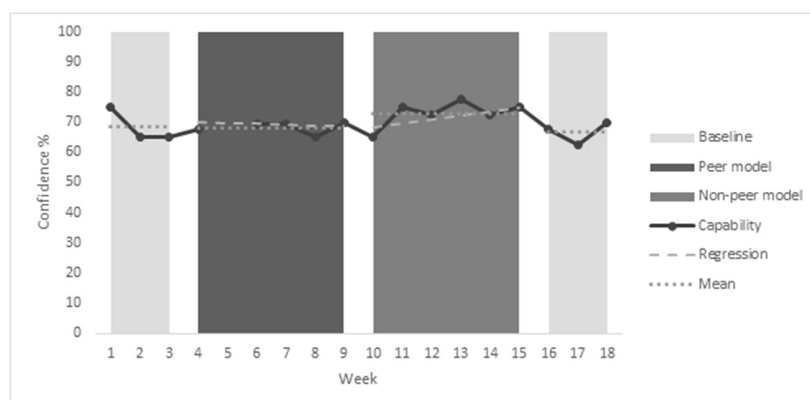

**Figure S3.** *Self-efficacy-as-capability for participant 2*



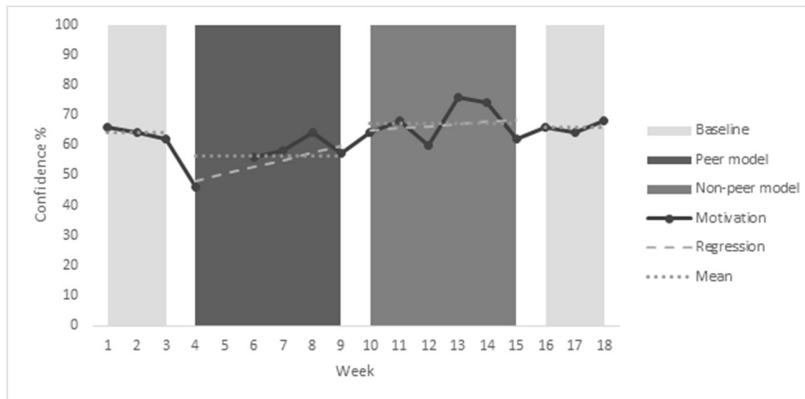

**Figure S4.** *Self-efficacy-as-motivation for participant 2*

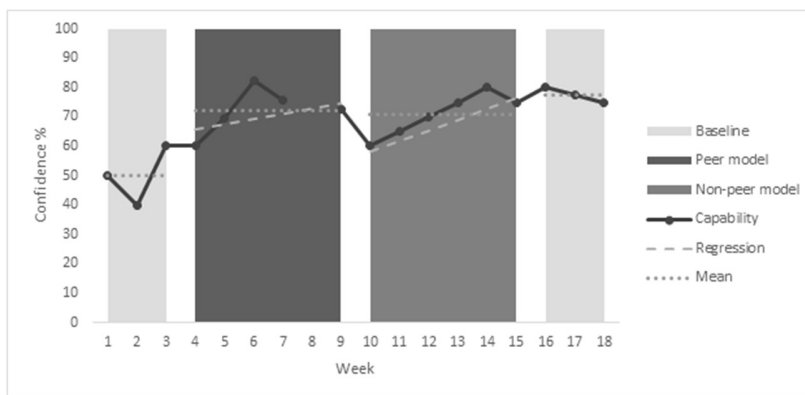

**Figure S5.** *Self-efficacy-as-capability for participant 3*

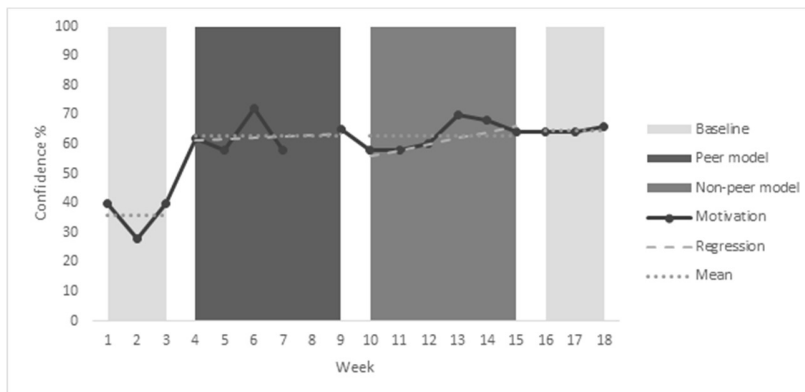

**Figure S6.** *Self-efficacy-as-motivation for participant 3*



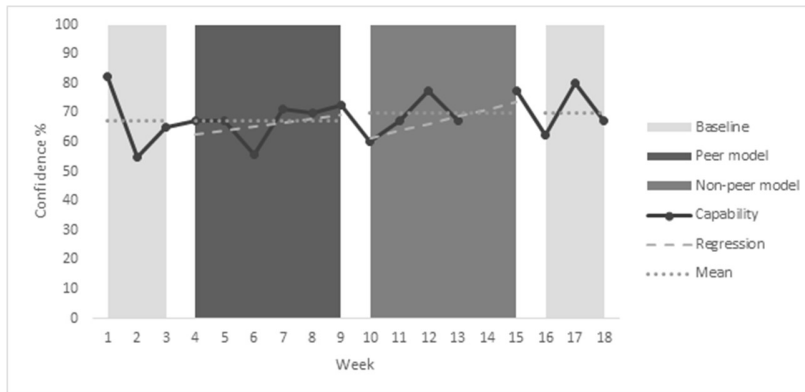

**Figure S7.** *Self-efficacy-as-capability for participant 4*

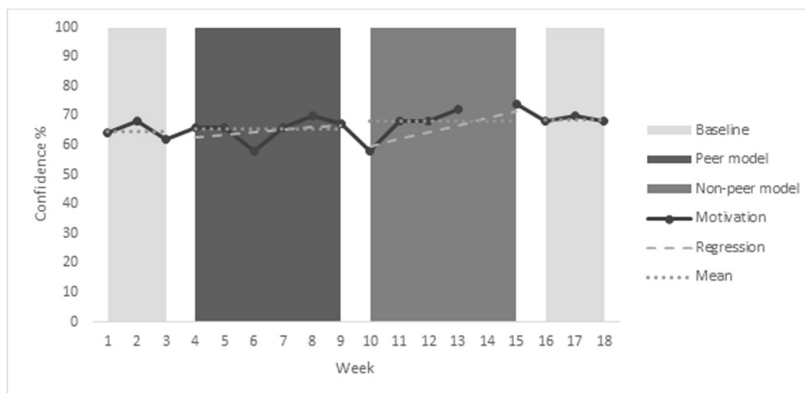

**Figure S8.** *Self-efficacy-as-motivation for participant 4*
